# Supplementary material for: Enhanced stability of natural vitamin E from palm oil by forming inclusion complexes with cyclodextrin and its application on PLA fabric
Source: Royal Society of Chemistry journal article supplement (doi:10.1039/d3nj05652j), 2024-01-01
Supplement: d3nj05652j1.pdf [file d3nj05652j1.pdf]

**Supplementary figures**

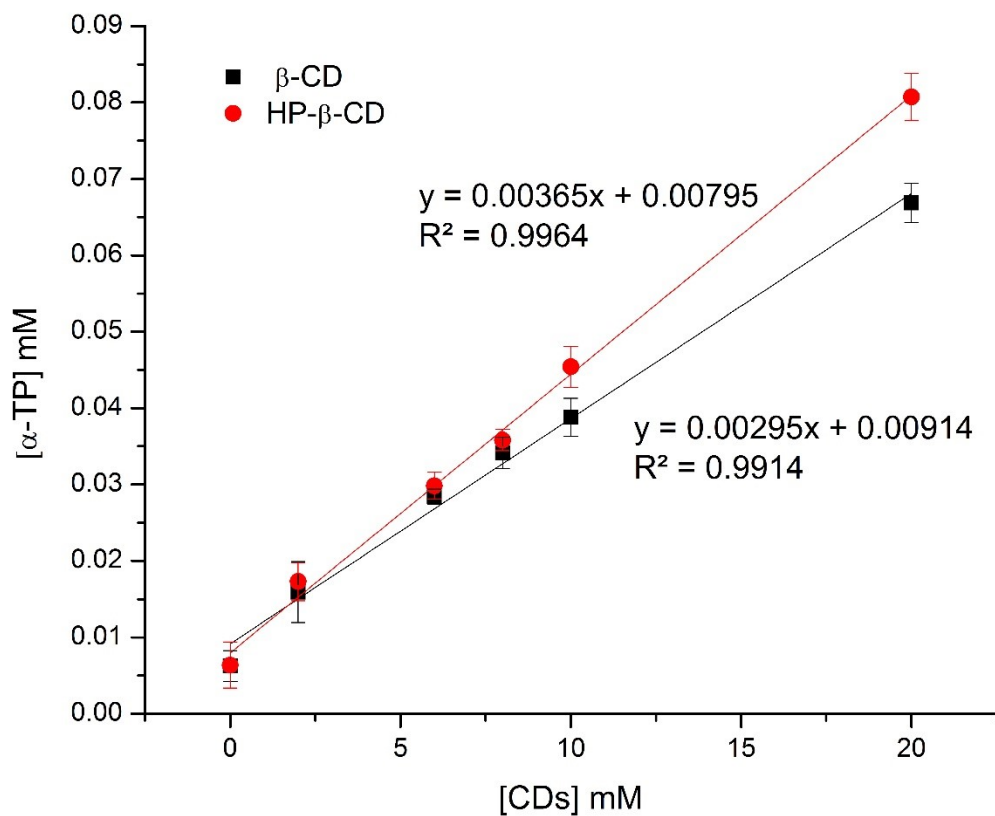

**Fig. S1.** Phase solubility diagram of  $\alpha$ -TP/ $\beta$ -CD (■) and  $\alpha$ -TP/HP- $\beta$ -CD (●) at room temperature.

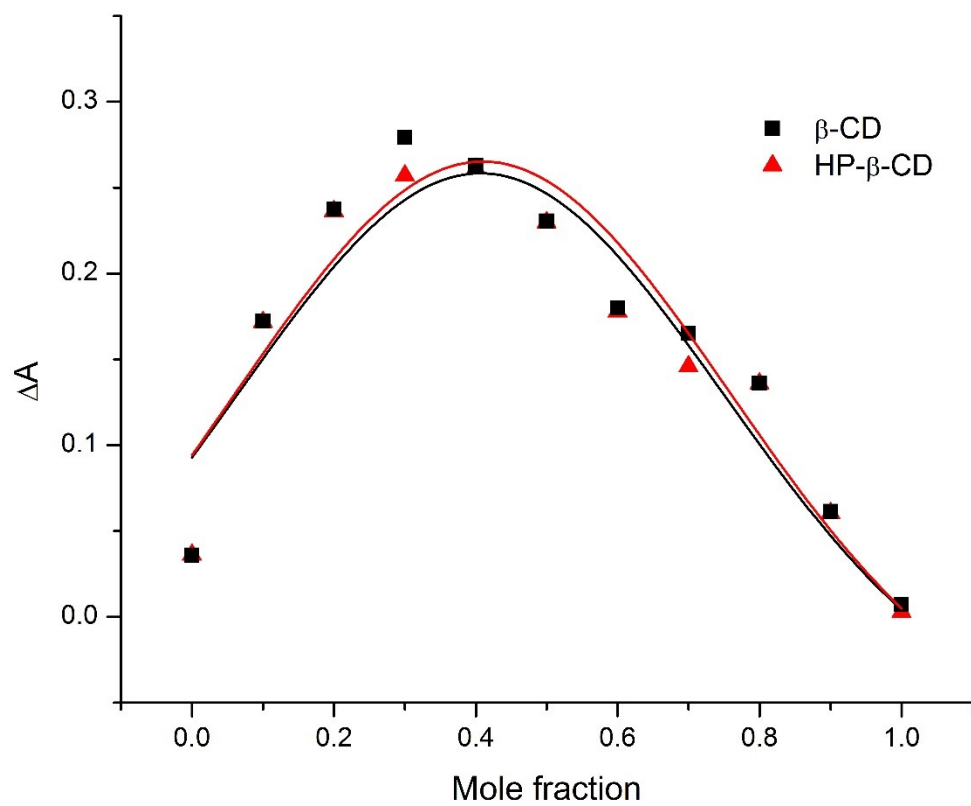

**Fig. S2.** Job's plot of  $\alpha$ -TP inclusion complex with  $\beta$ -CD (■) and HP- $\beta$ -CD (◻).

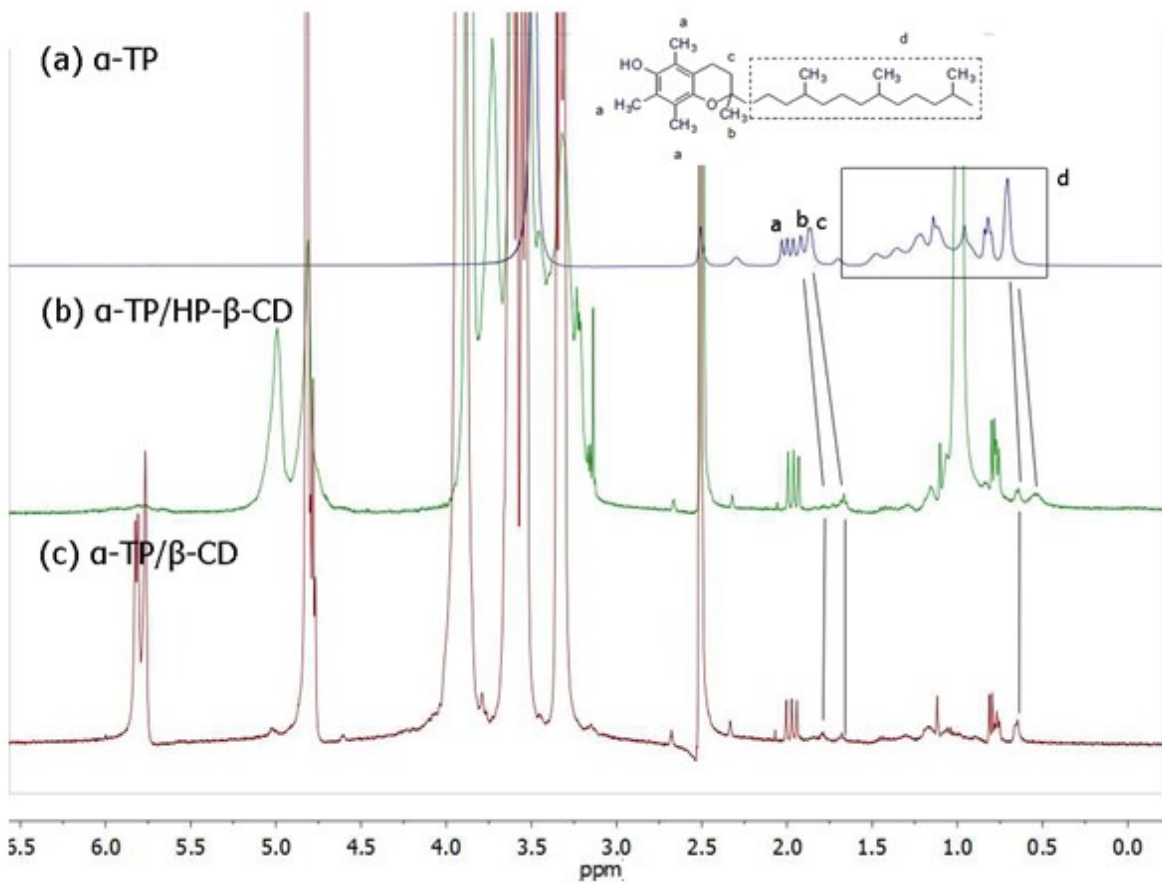

**Fig. S3.** An upfield shift of  $\alpha$ -TP in the inclusion complex observed in  $^1\text{H}$ -NMR spectra: (a)  $\alpha$ -TP (b)  $\alpha$ -TP/HP- $\beta$ -CD, and (c)  $\alpha$ -TP/ $\beta$ -CD.
